# Supplementary material for: Heterogenised catalysts for the H-transfer reduction reaction of aldehydes: influence of solvent and solvation effects on reaction performances
Source: Royal Society of Chemistry journal article supplement (doi:10.1039/d3cp01825c), 2023-01-01
Supplement: d3cp01825c1.pdf [file d3cp01825c1.pdf]

## Supporting Information

### **Heterogenised catalysts for the H-transfer reduction reaction of aldehydes: Influence of solvent and solvation effects on reaction performances**

Atika Muhammad<sup>a†</sup>, Chengxu Zhu<sup>a†</sup>, Xiao Yu<sup>a</sup>, Graziano Di Carmine<sup>b</sup>, Hannah Wood<sup>a</sup>,  
Paola Carbone<sup>a</sup>, Sam P. de Visser<sup>a</sup>, Christopher Hardacre<sup>a</sup>, Carmine D'Agostino<sup>a,c\*</sup>

<sup>a</sup>Department of Chemical Engineering, The University of Manchester, Oxford Road, M13  
9PL, UK

<sup>b</sup>Dipartimento di Scienze Chimiche, Farmaceutiche ed Agrarie, Università degli Studi di  
Ferrara, Via L. Borsari, 46, I-44121 Ferrara, Italy

<sup>c</sup>Dipartimento di Ingegneria Civile, Chimica, Ambientale e dei Materiali (DICAM), Alma  
Mater Studiorum – Università di Bologna, Via Terracini, 28, 40131 Bologna, Italy

†These two authors contributed equally to this work and are co-first authors.

\*Corresponding Author:

Dr Carmine D'Agostino

Email: [carmine.dagostino@manchester.ac.uk](mailto:carmine.dagostino@manchester.ac.uk)

**Table S1.** General Amber force field parameters

| Atom type | Mass      | Ptype | Sigma (nm) | Epsilon (kJ/mol) |
|-----------|-----------|-------|------------|------------------|
| c3        | 12.010000 | A     | 0.33996695 | 0.4577296        |
| c         | 12.010000 | A     | 0.33996695 | 0.359824         |
| o         | 16.000000 | A     | 0.29599219 | 0.87864          |
| hc        | 1.008000  | A     | 0.26495328 | 0.0656888        |
| h4        | 1.008000  | A     | 0.25105526 | 0.06276          |
| oh        | 16.000000 | A     | 0.30664734 | 0.8803136        |
| h1        | 1.008000  | A     | 0.2471353  | 0.0656888        |
| ho        | 1.008000  | A     | 0          | 0                |
| Y1        | 16.000000 | A     | 0.29599219 | 0.87864          |
| Y2        | 16.000000 | A     | 0.29599219 | 0.87864          |
| Y3        | 16.000000 | A     | 0.29599219 | 0.87864          |
| M1        | 26.980000 | A     | 0.22272468 | 0.010193772      |
| os        | 16.000000 | A     | 0.30000123 | 0.71128          |
| ca        | 12.010000 | A     | 0.33996695 | 0.359824         |
| ha        | 1.008000  | A     | 0.25996425 | 0.06276          |

**Table S2.** Parameters for cyclohexane

| Atom type | Atom name | Coordination |        |        | Charge      |
|-----------|-----------|--------------|--------|--------|-------------|
|           |           | X            | Y      | Z      |             |
| c3        | C1        | -0.380       | 1.220  | -0.660 | -0.07473300 |
| hc        | H2        | -1.460       | 1.200  | -0.440 | 0.03770000  |
| hc        | H3        | -0.200       | 2.140  | -1.220 | 0.03770000  |
| c3        | C4        | 0.380        | 1.220  | 0.660  | -0.07473300 |
| hc        | H5        | 1.460        | 1.200  | 0.440  | 0.03770000  |
| hc        | H6        | 0.200        | 2.140  | 1.220  | 0.03770000  |
| c3        | C7        | 0.000        | 0.000  | 1.520  | -0.07473300 |
| hc        | H8        | 0.840        | -0.260 | 2.180  | 0.03770000  |
| hc        | H9        | -0.840       | 0.260  | 2.180  | 0.03770000  |
| c3        | C10       | -0.380       | -1.220 | 0.660  | -0.07473300 |
| hc        | H11       | -0.200       | -2.140 | 1.220  | 0.03770000  |
| hc        | H12       | -1.460       | -1.200 | 0.440  | 0.03770000  |
| c3        | C13       | 0.380        | -1.220 | -0.660 | -0.07473300 |
| hc        | H14       | 0.200        | -2.140 | -1.220 | 0.03770000  |
| hc        | H15       | 1.460        | -1.200 | -0.440 | 0.03770000  |
| c3        | C16       | 0.000        | 0.000  | -1.520 | -0.07473300 |
| hc        | H17       | 0.840        | 0.260  | -2.180 | 0.03770000  |
| hc        | H18       | -0.840       | -0.260 | -2.180 | 0.033698    |

**Table S3.** Parameters for diethyl ether

| Atom type | Atom name | Coordination |        |        | Charge      |
|-----------|-----------|--------------|--------|--------|-------------|
|           |           | X            | Y      | Z      |             |
| os        | O1        | 0.000        | 0.000  | 0.260  | -0.4276000  |
| c3        | C2        | 0.000        | 1.180  | -0.520 | 0.13040000  |
| h1        | H3        | 0.890        | 1.200  | -1.170 | 0.02270000  |
| h1        | H4        | -0.890       | 1.200  | -1.170 | 0.02270000  |
| c3        | C5        | 0.000        | 2.380  | 0.410  | -0.09610000 |
| hc        | H6        | 0.880        | 2.370  | 1.050  | 0.04470000  |
| hc        | H7        | 0.000        | 3.310  | -0.160 | 0.04470000  |
| hc        | H8        | -0.880       | 2.370  | 1.050  | 0.04470000  |
| c3        | C9        | 0.000        | -1.180 | -0.520 | 0.13040000  |
| h1        | H10       | 0.890        | -1.200 | -1.170 | 0.02270000  |
| h1        | H11       | -0.890       | -1.200 | -1.170 | 0.02270000  |
| c3        | C12       | 0.000        | -2.380 | 0.410  | -0.09610000 |
| hc        | H13       | -0.880       | -2.370 | 1.050  | 0.04470000  |
| hc        | H14       | 0.000        | -3.310 | -0.160 | 0.04470000  |
| hc        | H15       | 0.880        | -2.370 | 1.050  | 0.04470000  |

**Table S4.** Parameters for 1,4-dioxane

| Atom type | Atom name | Coordination |        |        | Charge      |
|-----------|-----------|--------------|--------|--------|-------------|
|           |           | X            | Y      | Z      |             |
| c3        | C1        | 0.230        | 0.730  | 1.170  | 0.09140000  |
| h1        | H2        | 1.320        | 0.770  | 1.220  | 0.05720000  |
| h1        | H3        | -0.190       | 1.260  | 2.020  | 0.05720000  |
| c3        | C4        | -0.230       | -0.730 | 1.170  | 0.09140000  |
| h1        | H5        | 0.190        | -1.260 | 2.020  | 0.05720000  |
| h1        | H6        | -1.320       | -0.770 | 1.220  | 0.05720000  |
| c3        | C7        | -0.230       | -0.730 | -1.170 | 0.09140000  |
| h1        | H8        | 0.190        | -1.260 | -2.020 | 0.05720000  |
| h1        | H9        | -1.320       | -0.770 | -1.220 | 0.05720000  |
| c3        | C10       | 0.230        | 0.730  | -1.170 | 0.09140000  |
| h1        | H11       | 1.320        | 0.770  | -1.220 | 0.05720000  |
| h1        | H12       | -0.190       | 1.260  | -2.020 | 0.05720000  |
| os        | O13       | -0.230       | 1.400  | 0.000  | -0.41160000 |
| os        | O14       | 0.230        | -1.400 | 0.000  | -0.41160000 |

**Table S5.** Parameters for *n*-hexane

| Atom type | Atom name | Coordination |        |        | Charge      |
|-----------|-----------|--------------|--------|--------|-------------|
|           |           | X            | Y      | Z      |             |
| c3        | C1        | 1.410        | 2.890  | 0.000  | -0.09310000 |
| hc        | H2        | 0.900        | 3.280  | 0.880  | 0.03270000  |
| hc        | H3        | 0.900        | 3.280  | -0.880 | 0.03270000  |
| hc        | H4        | 2.430        | 3.290  | 0.000  | 0.03270000  |
| c3        | C5        | 1.410        | 1.360  | 0.000  | -0.08040000 |
| hc        | H6        | 1.960        | 1.000  | -0.880 | 0.03870000  |
| hc        | H7        | 1.960        | 1.000  | 0.880  | 0.03870000  |
| c3        | C8        | 0.010        | 0.760  | 0.000  | -0.07940000 |
| hc        | H9        | -0.540       | 1.130  | -0.880 | 0.03870000  |
| hc        | H10       | -0.540       | 1.130  | 0.880  | 0.03870000  |
| c3        | C11       | -0.010       | -0.760 | 0.000  | -0.07940000 |
| hc        | H12       | 0.540        | -1.130 | 0.880  | 0.03870000  |
| hc        | H13       | 0.540        | -1.130 | -0.880 | 0.03870000  |
| c3        | C14       | -1.410       | -1.360 | 0.000  | -0.08040000 |
| hc        | H15       | -1.960       | -1.000 | -0.880 | 0.03870000  |
| hc        | H16       | -1.960       | -1.000 | 0.880  | 0.03870000  |
| c3        | C17       | -1.410       | -2.890 | 0.000  | -0.09310000 |
| hc        | H18       | -0.900       | -3.280 | 0.880  | 0.03270000  |
| hc        | H19       | -2.430       | -3.290 | 0.000  | 0.03270000  |
| hc        | H20       | -0.900       | -3.280 | -0.880 | 0.03270000  |

**Table S6.** Parameters for toluene

| Atom type | Atom name | Coordination |        |        | Charge      |
|-----------|-----------|--------------|--------|--------|-------------|
|           |           | X            | Y      | Z      |             |
| ca        | C1        | -0.000       | 0.910  | 0.000  | -0.07730000 |
| ca        | C2        | -0.010       | 0.190  | 1.200  | -0.13100000 |
| ca        | C3        | -0.010       | -1.200 | 1.200  | -0.12700000 |
| ca        | C4        | -0.010       | -1.900 | 0.000  | -0.13500000 |
| ca        | C5        | -0.010       | -1.200 | -1.200 | -0.12700000 |
| ca        | C6        | -0.010       | 0.190  | -1.200 | -0.13100000 |
| ha        | H7        | -0.010       | 0.730  | 2.140  | 0.13000200  |
| ha        | H8        | -0.010       | -1.730 | 2.140  | 0.13000200  |
| ha        | H9        | -0.010       | -2.980 | 0.000  | 0.13000200  |
| ha        | H10       | -0.010       | -1.730 | -2.140 | 0.13000200  |
| ha        | H11       | -0.010       | 0.730  | -2.140 | 0.13000200  |
| c3        | C12       | 0.030        | 2.420  | 0.000  | -0.05380000 |
| hc        | H13       | -0.460       | 2.820  | 0.880  | 0.04403000  |
| hc        | H14       | 1.060        | 2.780  | 0.000  | 0.04403000  |
| hc        | H15       | -0.460       | 2.820  | -0.880 | 0.04403000  |

**Table S7.** Parameters for 2-propanol

| Atom type | Atom name | Coordination |        |        | Charge      |
|-----------|-----------|--------------|--------|--------|-------------|
|           |           | X            | Y      | Z      |             |
| c3        | C1        | -1.327       | -0.532 | -0.090 | -0.11160000 |
| c3        | C2        | -0.002       | 0.042  | 0.367  | 0.13910000  |
| c3        | C3        | 1.177        | -0.793 | -0.102 | -0.11160000 |
| hc        | H4        | -2.149       | 0.101  | 0.243  | 0.04336700  |
| hc        | H5        | -1.350       | -0.582 | -1.180 | 0.04336700  |
| hc        | H6        | -1.470       | -1.536 | 0.311  | 0.04336700  |
| oh        | O7        | 0.067        | 1.361  | -0.162 | -0.60180000 |
| h1        | H8        | 0.006        | 0.090  | 1.464  | 0.02870000  |
| hc        | H9        | 2.123        | -0.355 | 0.224  | 0.04336700  |
| hc        | H10       | 1.122        | -1.806 | 0.299  | 0.04336700  |
| hc        | H11       | 1.181        | -0.848 | -1.192 | 0.04336700  |
| ho        | H12       | 0.915        | 1.746  | 0.076  | 0.39699800  |

**Table S8.** Parameters for propionaldehyde

| Atom type | Atom name | Coordination |        |        | Charge      |
|-----------|-----------|--------------|--------|--------|-------------|
|           |           | X            | Y      | Z      |             |
| c3        | C1        | -1.669       | -0.296 | -0.174 | -0.09210000 |
| c3        | C2        | -0.472       | 0.603  | 0.136  | -0.20440000 |
| c         | C3        | 0.778        | -0.213 | 0.315  | 0.56490000  |
| o         | O4        | 1.794        | -0.055 | -0.301 | -0.52810000 |
| hc        | H5        | -2.585       | 0.290  | -0.234 | 0.04003300  |
| hc        | H6        | -1.533       | -0.812 | -1.124 | 0.04003300  |
| hc        | H7        | -1.805       | -1.050 | 0.603  | 0.04003300  |
| hc        | H8        | -0.298       | 1.338  | -0.649 | 0.07320050  |
| hc        | H9        | -0.650       | 1.136  | 1.075  | 0.07320050  |
| h4        | H10       | 0.705        | -1.020 | 1.075  | -0.00680000 |

**Table 9.** Parameters for aluminium isopropoxide

| Atom type | Atom name | Coordination |        |        | Charge      |
|-----------|-----------|--------------|--------|--------|-------------|
|           |           | X            | Y      | Z      |             |
| SB1       |           |              |        |        |             |
| Y1        | O         | 1.332        | -1.026 | 0.122  | -0.82502400 |
| c3        | C         | 2.716        | -0.788 | 0.297  | 0.61194600  |
| c3        | C1        | 3.405        | -2.126 | 0.495  | -0.27844500 |
| c3        | C2        | 3.277        | -0.030 | -0.896 | -0.35086500 |
| h1        | H         | 2.858        | -0.178 | 1.197  | -0.07221900 |
| hc        | H1        | 4.473        | -1.990 | 0.671  | 0.06113400  |
| hc        | H2        | 2.973        | -2.652 | 1.346  | 0.06113400  |
| hc        | H3        | 3.272        | -2.743 | -0.395 | 0.06113400  |
| hc        | H4        | 4.344        | 0.159  | -0.771 | 0.07473300  |
| hc        | H5        | 3.133        | -0.618 | -1.805 | 0.07473300  |
| hc        | H6        | 2.769        | 0.929  | -1.011 | 0.07473300  |
| SB2       |           |              |        |        |             |
| Y2        | O         | 0.239        | 1.658  | -0.085 | -0.82607800 |
| c3        | C         | -0.644       | 2.760  | -0.166 | 0.62039300  |
| c3        | C1        | 0.176        | 4.034  | -0.073 | -0.27291500 |
| c3        | C2        | -1.695       | 2.679  | 0.930  | -0.34389700 |
| h1        | H         | -1.151       | 2.735  | -1.138 | -0.07719900 |
| hc        | H1        | -0.461       | 4.914  | -0.169 | 0.05848000  |
| hc        | H2        | 0.685        | 4.073  | 0.892  | 0.05848000  |
| hc        | H3        | 0.929        | 4.058  | -0.860 | 0.05848000  |
| hc        | H4        | -2.382       | 3.525  | 0.876  | 0.07267000  |
| hc        | H5        | -2.274       | 1.759  | 0.836  | 0.07267000  |
| hc        | H6        | -1.207       | 2.691  | 1.908  | 0.07267000  |
| SB3       |           |              |        |        |             |
| Y3        | O         | -1.516       | -0.641 | -0.375 | -0.82874400 |
| c3        | C         | -2.058       | -1.946 | -0.428 | 0.61098700  |
| c3        | C1        | -3.563       | -1.829 | -0.587 | -0.27396400 |
| c3        | C2        | -1.678       | -2.732 | 0.817  | -0.33227600 |
| h1        | H         | -1.648       | -2.460 | -1.305 | -0.07271000 |
| hc        | H1        | -4.022       | -2.814 | -0.675 | 0.05938000  |
| hc        | H2        | -3.986       | -1.322 | 0.283  | 0.05938000  |
| hc        | H3        | -3.805       | -1.247 | -1.476 | 0.05938000  |
| hc        | H4        | -2.087       | -3.742 | 0.780  | 0.07017400  |
| hc        | H5        | -0.592       | -2.802 | 0.909  | 0.07017400  |
| hc        | H6        | -2.075       | -2.231 | 1.703  | 0.07017400  |
| AL1       |           |              |        |        |             |
| M1        | AL        | 0.015        | -0.007 | -0.109 | 1.52129700  |

**Table S10.**  $T_1$  and  $T_2$  values of the solvents and reactants in  $\text{SiO}_2$  and  $\text{Al}(\text{O}^i\text{Pr})_3\text{-SiO}_2$ 

| Compound         | $\text{SiO}_2$ |            |           | $\text{Al}(\text{O}^i\text{Pr})_3\text{-SiO}_2$ |            |           |
|------------------|----------------|------------|-----------|-------------------------------------------------|------------|-----------|
|                  | $T_1$ (ms)     | $T_2$ (ms) | $T_1/T_2$ | $T_1$ (ms)                                      | $T_2$ (ms) | $T_1/T_2$ |
| <i>n</i> -hexane | 1446.01        | 198.31     | 7.3       | 755.26                                          | 276.21     | 2.7       |
| cyclohexane      | 1382.35        | 181.42     | 7.6       | 540.23                                          | 168.71     | 3.2       |
| toluene          | 2962.29        | 282.29     | 10.5      | 1767.61                                         | 438.61     | 4.0       |
| 1,4-dioxane      | 2187.9         | 192.31     | 11.4      | 203.96                                          | 38.41      | 5.3       |
| diethyl ether    | 3217.54        | 282.29     | 11.4      | 961.34                                          | 122.76     | 7.8       |
| propionaldehyde  | 600.19         | 120.55     | 5.0       | 144.73                                          | 57.23      | 2.5       |
| 2- propanol      | 1065.03        | 139.71     | 7.6       | 264.81                                          | 88.76      | 3.0       |

**Table S11.**  $T_1$  and  $T_2$  values of the solvents and reactants in  $\text{TiO}_2$  and  $\text{Al}(\text{O}^i\text{Pr})_3\text{-TiO}_2$ 

| Compound         | $\text{TiO}_2$ |            |           | $\text{Al}(\text{O}^i\text{Pr})_3\text{-TiO}_2$ |            |           |
|------------------|----------------|------------|-----------|-------------------------------------------------|------------|-----------|
|                  | $T_1$ (ms)     | $T_2$ (ms) | $T_1/T_2$ | $T_1$ (ms)                                      | $T_2$ (ms) | $T_1/T_2$ |
| <i>n</i> -hexane | 1683.06        | 200.01     | 8.4       | 711.02                                          | 243.66     | 2.9       |
| cyclohexane      | 2301.59        | 232.5      | 9.9       | 647.82                                          | 176.17     | 3.7       |
| toluene          | 2930.82        | 239.64     | 12.2      | 1890.64                                         | 454.21     | 4.2       |
| 1,4-dioxane      | 1894.64        | 153.85     | 12.3      | 185.37                                          | 34.57      | 5.4       |
| diethyl ether    | 3601.48        | 286.28     | 12.6      | 954.95                                          | 119.47     | 8         |
| propionaldehyde  | 800.24         | 156.69     | 5.1       | 177.29                                          | 77.87      | 2.3       |
| 2- propanol      | 988.85         | 111.77     | 8.9       | 262.94                                          | 88.67      | 3.0       |

**Table S12.**  $T_1$  and  $T_2$  values of the solvents and reactants in  $\text{Al}_2\text{O}_3$  and  $\text{Al}(\text{O}^i\text{Pr})_3\text{-Al}_2\text{O}_3$ 

| Compound         | $\text{Al}_2\text{O}_3$ |            |           | $\text{Al}(\text{O}^i\text{Pr})_3\text{-Al}_2\text{O}_3$ |            |           |
|------------------|-------------------------|------------|-----------|----------------------------------------------------------|------------|-----------|
|                  | $T_1$ (ms)              | $T_2$ (ms) | $T_1/T_2$ | $T_1$ (ms)                                               | $T_2$ (ms) | $T_1/T_2$ |
| <i>n</i> -hexane | 1750.02                 | 216.14     | 8.1       | 754.38                                                   | 270.39     | 2.8       |
| cyclohexane      | 1943.27                 | 227.15     | 8.6       | 482.71                                                   | 131.8      | 3.7       |
| toluene          | 2797.52                 | 235.69     | 11.9      | 1762.53                                                  | 428.19     | 4.1       |
| 1,4-dioxane      | 1696.14                 | 142.8      | 11.9      | 194.75                                                   | 36.69      | 5.3       |
| diethyl ether    | 2529.47                 | 207.57     | 12.2      | 909.17                                                   | 114.63     | 7.9       |
| propionaldehyde  | 1287.14                 | 248.00     | 5.2       | 177.27                                                   | 57.82      | 3.0       |
| 2- propanol      | 1056.77                 | 129.64     | 8.2       | 264.54                                                   | 87.19      | 3.0       |



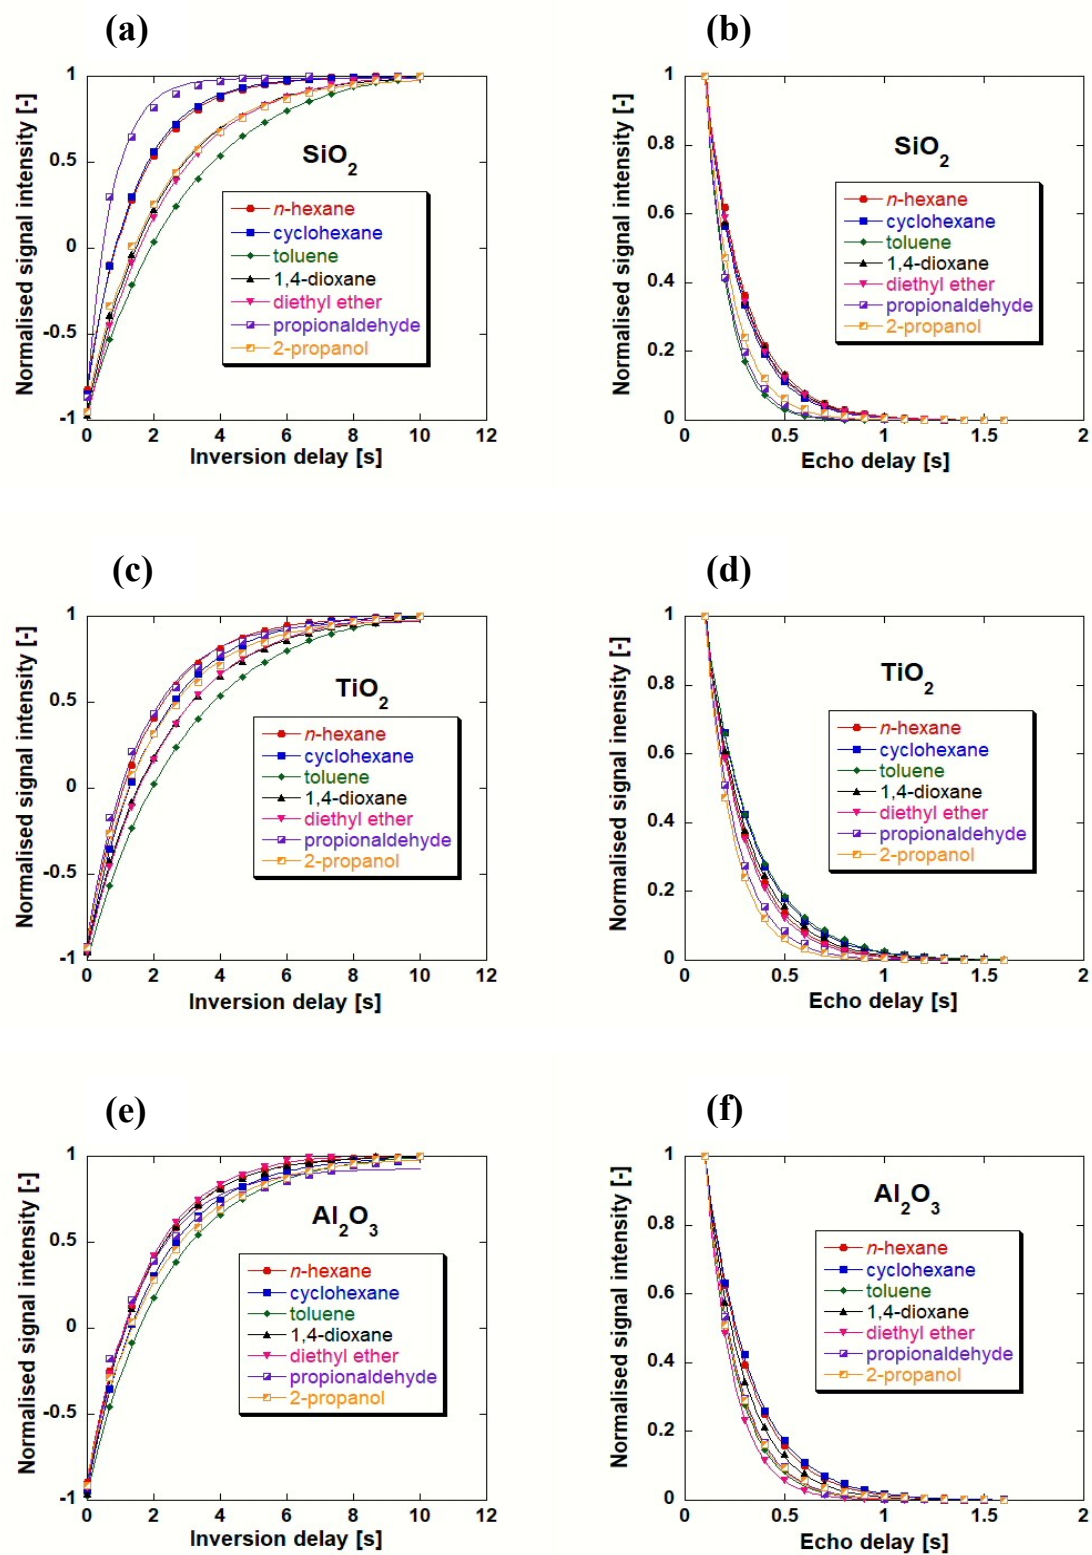

**Figure S1.**  $T_1$  relaxation plots for solvents and reactants within (a)  $\text{SiO}_2$ , (c)  $\text{TiO}_2$  and (e)  $\gamma\text{-Al}_2\text{O}_3$ .  $T_2$  CPMG plots for solvents and reactants within (b)  $\text{SiO}_2$ , (d)  $\text{TiO}_2$  and (f)  $\gamma\text{-Al}_2\text{O}_3$ .

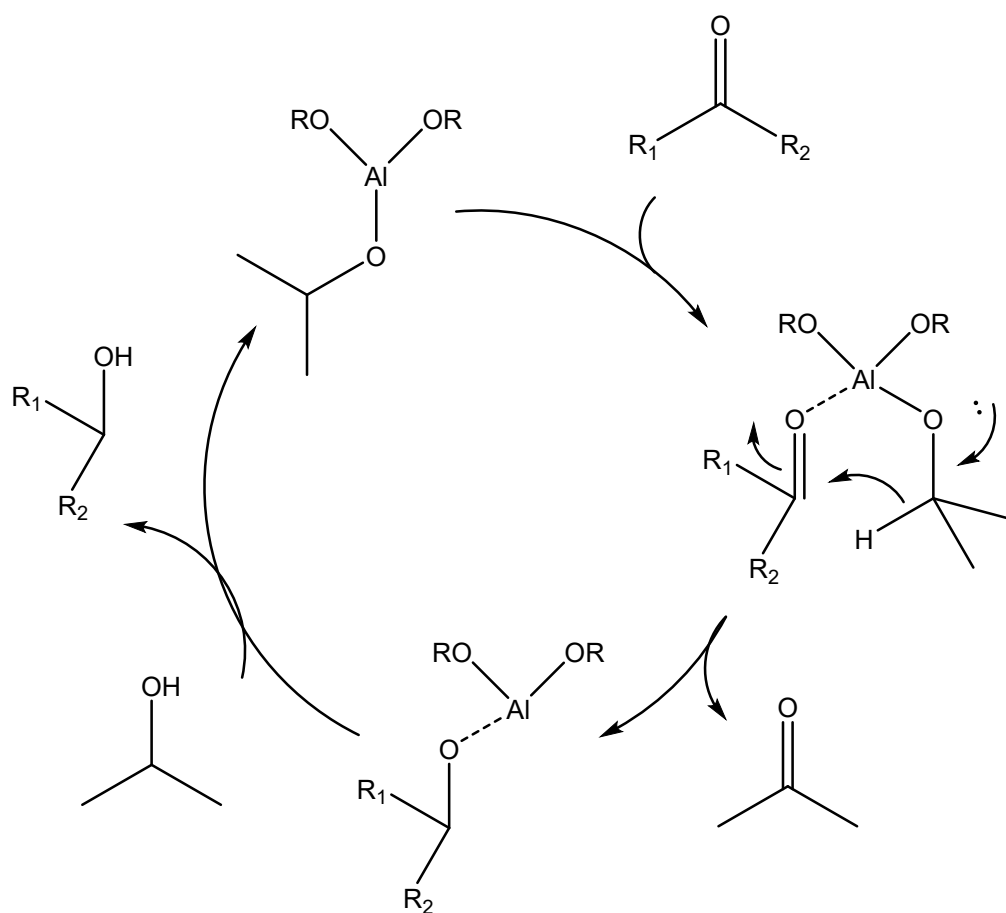

**Figure S2.** Mechanism of MPV reduction.
